# Supplementary material
Source: MDPI journal article supplement (https://www.mdpi.com/2624-8549/5/2/80)
Supplement: s1 [file s1]

# **Electronic Supplementary Information**

## **Tweaking of Peripheral Moieties in Catalytic Amyloid for Modulating Hydrogel Strength and Hydrolase Activity**

**Soumya Patra, Nimisha A. Mavlankar, Lakshminarayan Ramesan,  
Ashmeet Singh and Asish Pal \***

Chemical Biology Unit, Institute of Nano Science & Technology, Sector 81, Mohali 140306, Punjab, India

\* Correspondence: [apal@inst.ac.in](mailto:apal@inst.ac.in)

# Table of Contents

1. AFM images of PA **1** in Ethanol-water and 10% DMSO-water at early stage of assembly
2. AFM images of **1** and **2** with metals in 10% DMSO-water
3. UV-vis absorption spectra of **1** at different times
4. AFM images of **1** and **2** with metals in ethanol-water
5. ThT Emission spectra of samples
6. UV-vis spectrophotometric titration of peptides **1** and **2** with different concentrations of Cu(II) and Zn(II)
7. Kinetic experiment with metal-peptide co-assemblies in 10% DMSO-water
8. Assessment of catalytic parameters from Lineweaver-Burk plots.
9. AFM images of **1** (concentration 0.001 mM) in (a) ethanol-water and (b) 10 % DMSO-water at initial stages of the assembly. Initiation of fibrillar growth can be seen in case of ethanol-water medium; however, in presence of DMSO, no fibrillar assembly is noted, rather presence of nanoparticles is observed.

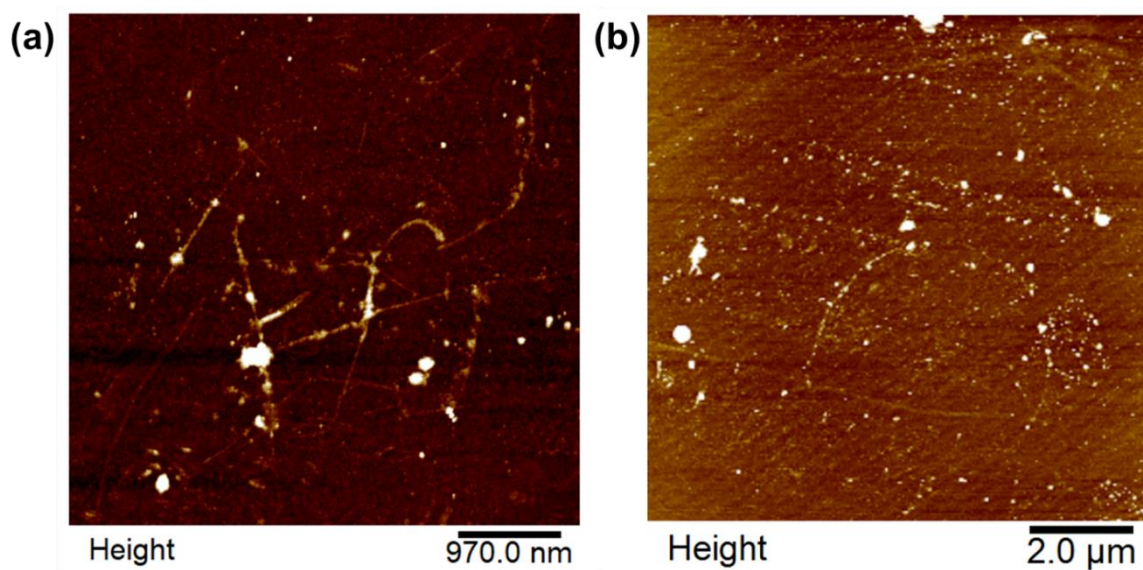

**Figure S1:** AFM images of 1 (concentration 0.001 mM) in (a) ethanol-water and (b) 10 % DMSO-water at initial stages of the assembly. Initiation of fibrillar growth can be seen in case of ethanol-water medium; however, in presence of DMSO, no fibrillar assembly is noted, rather presence of nanoparticles is observed.

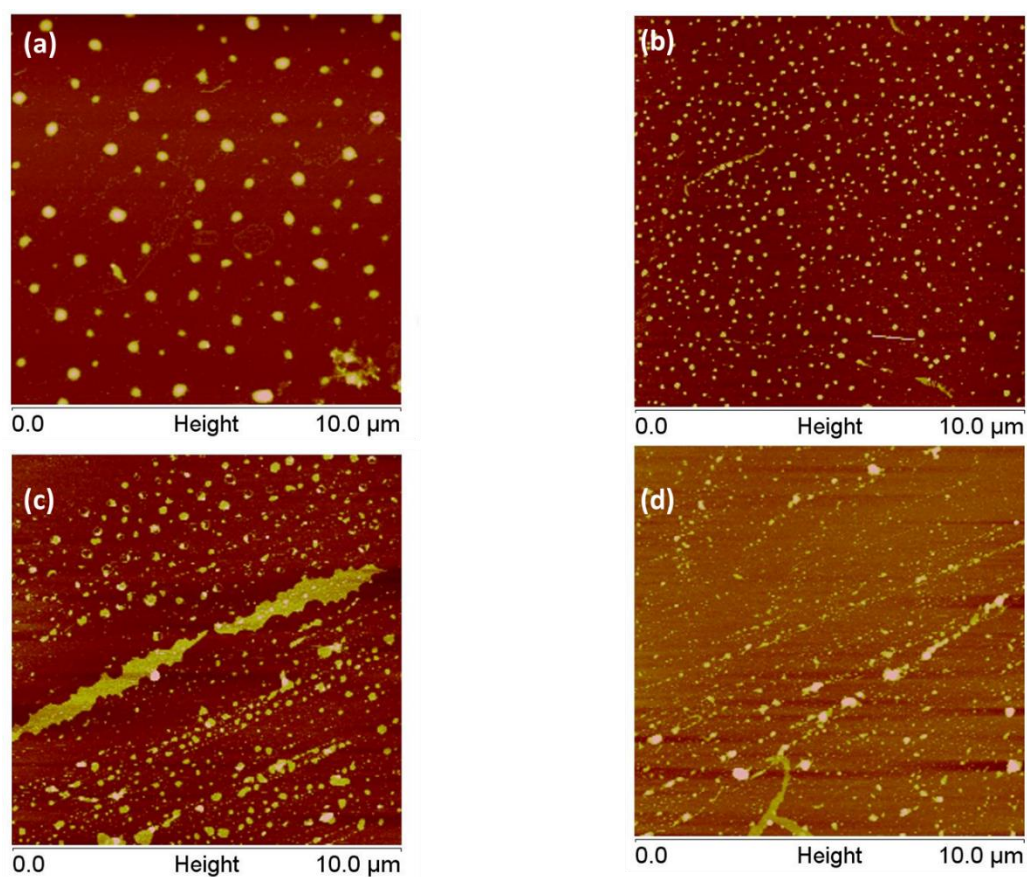

**Figure S2:** AFM images of (a) 1+Cu, (b) 1+Zn, (c) 2+Cu and (d) 2+Zn in 10% DMSO-water (0.01 mM) showing presence of nanoparticles and lack of fibrillar assembly.

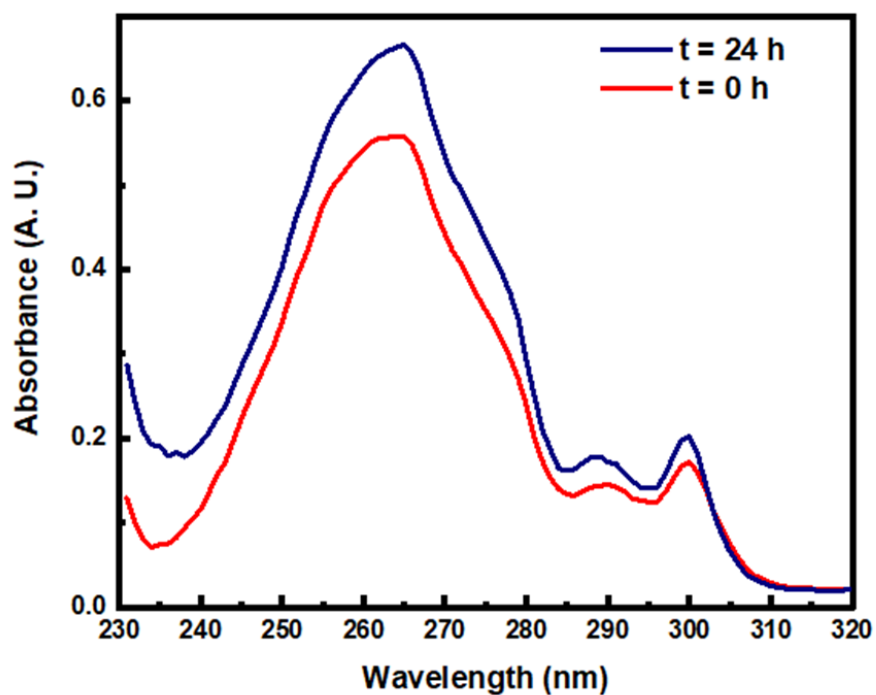

**Figure S3:** UV-vis absorption spectra of **1**, for freshly prepared solution in EtOH/water and after 24-hour of incubation period showing increase in intensity upon assembly. A slight redshift in the absorption maximum near 265 nm is also noted.

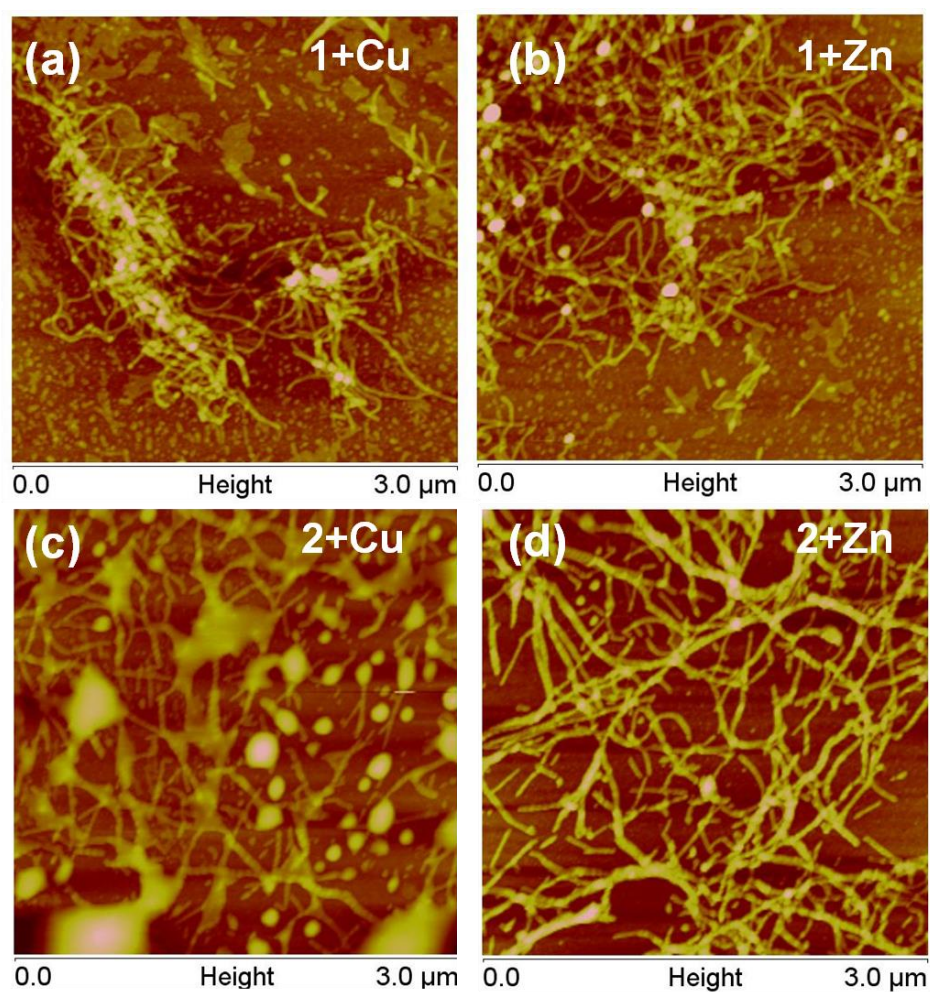

**Figure S4:** AFM images of (a) 1+Cu, (b) 1+Zn, (c) 2+Cu and (d) 2+Zn in EtOH/water showing formation of fibrillar morphology upon co-assembly. Diminished network density for **1** and enhanced density for **2** upon self-assembly with metals is observed (as compared to without metal ions).

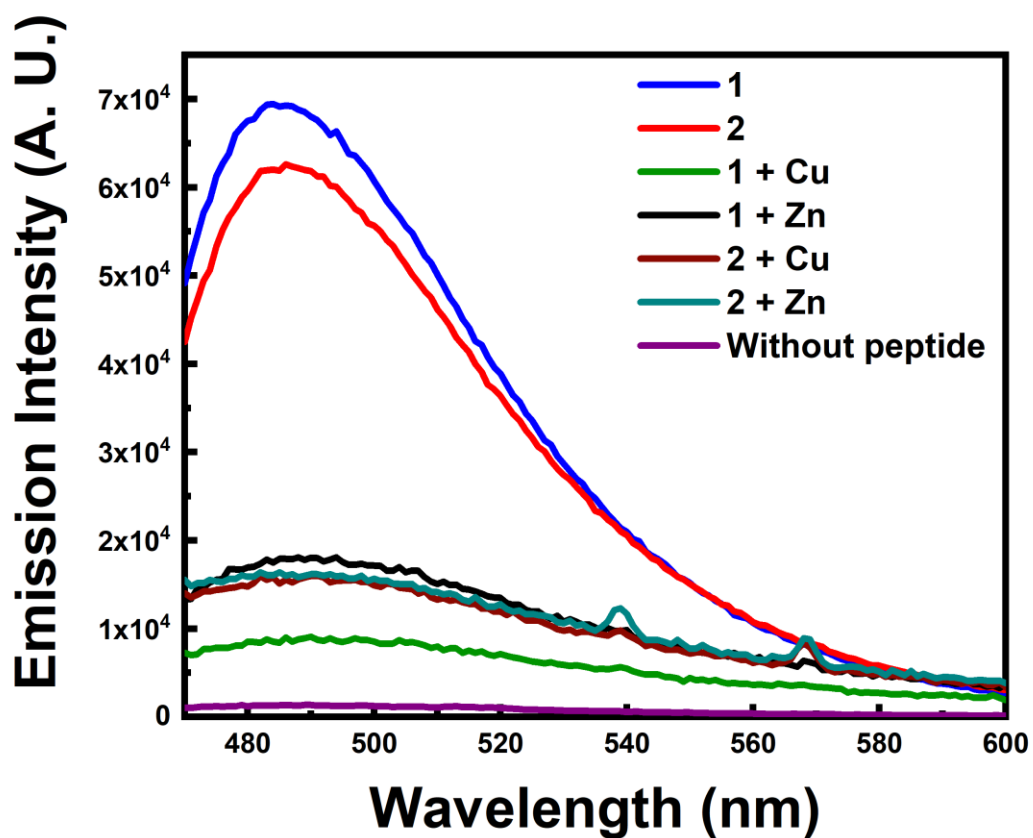

**Figure S5:** ThT fluorescence emission spectra of samples with and without metal ions and that of ThT in water not bound to any self-assembled peptide.



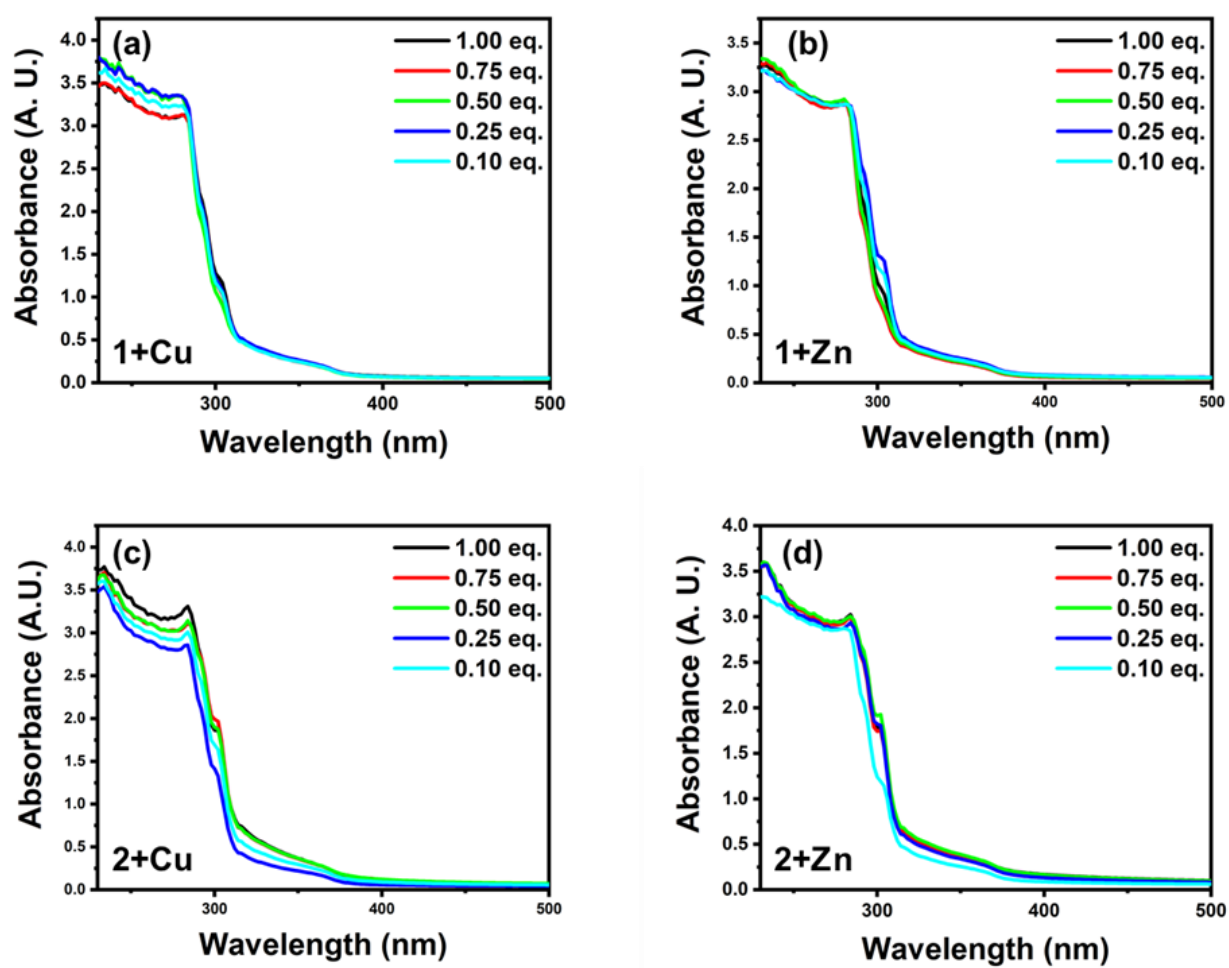

**Figure S6:** UV-vis spectrophotometric titration of peptides **1** and **2** with different concentrations of Cu(II) and Zn(II).



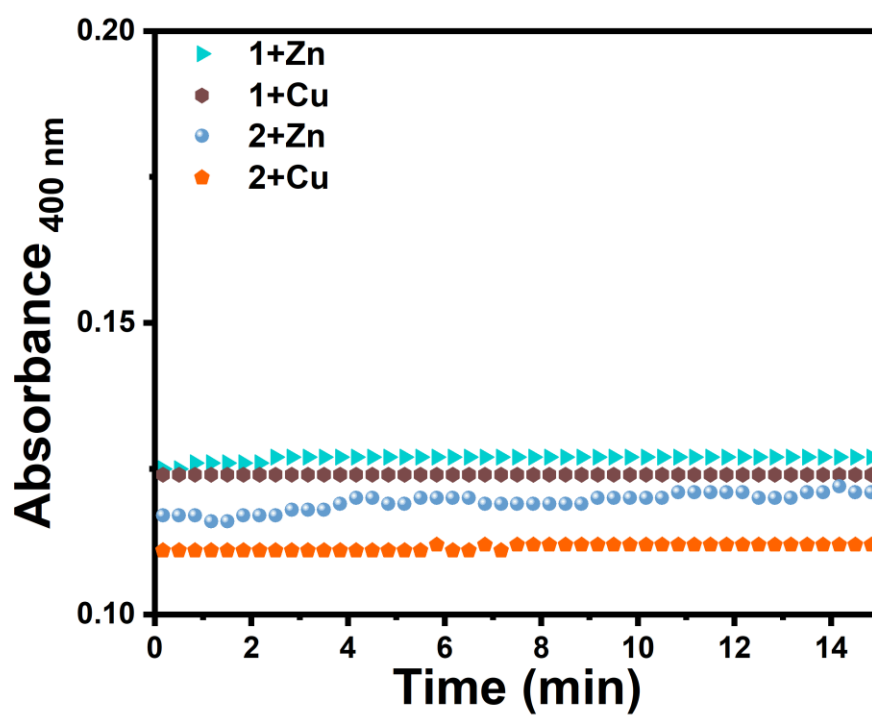

**Figure S7:** Absorbance *vs.* time plot for *p*-NPA hydrolysis by co-assemblies of **1** and **2** with metals in DMSO, showing diminished catalytic activity due to lack of nanofibrous assembly in this unsuitable solvent.

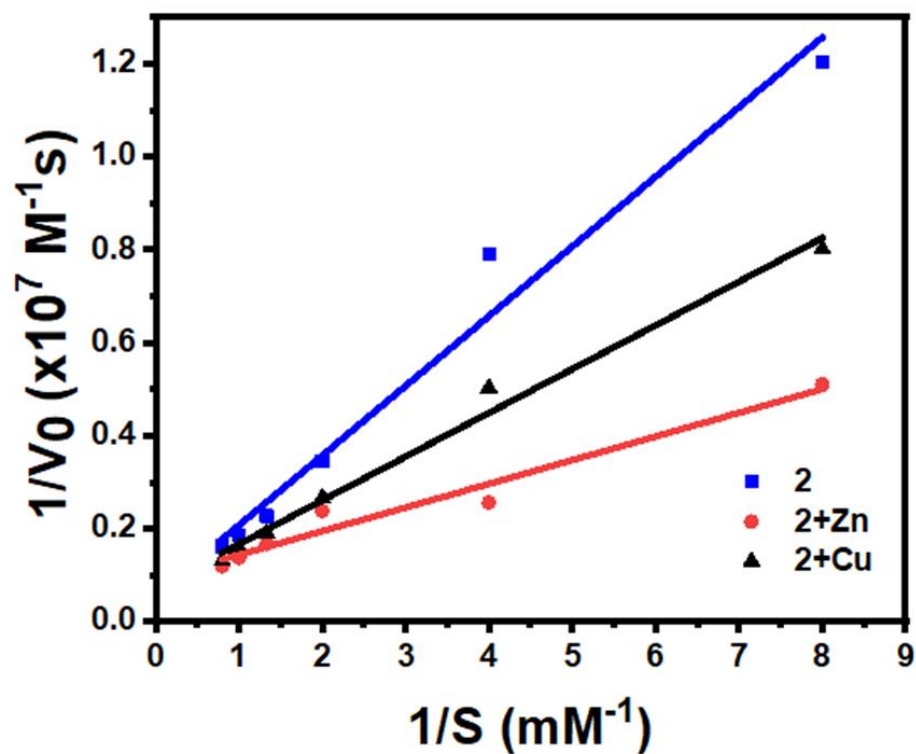

**Figure S8:** Lineweaver-Burk plots for the catalysts **2**, **2+Cu** and **2+Zn** . The values of y-axis intercept and slope yields the values of  $1/V_{max}$  and  $K_M/V_{max}$  respectively.

**Table S1:** Kinetic parameters obtained from Lineweaver-Burk plots for **2**, **2+Cu** and **2+Zn**

| Sample      | $V_{max}$ (M <sup>-1</sup> s <sup>-1</sup> ) | $K_M$ (mM) | $k_{cat}/K_M$ (mM <sup>-1</sup> s <sup>-1</sup> ) | $R^2$ |
|-------------|----------------------------------------------|------------|---------------------------------------------------|-------|
| <b>2</b>    | 17.27                                        | 2.59       | 26.68                                             | 0.975 |
| <b>2+Cu</b> | 13.67                                        | 1.29       | 42.51                                             | 0.989 |
| <b>2+Zn</b> | 10.73                                        | 0.55       | 78.57                                             | 0.963 |
